# Diabetes Care<sup>®</sup>

THE JOURNAL OF CLINICAL AND APPLIED RESEARCH AND EDUCATION

January 2023 Volume 46, Supplement 1

[T]he simple word *Care* may suffice to express [the journal's] philosophical mission. The new journal is designed to promote better patient care by serving the expanded needs of all health professionals committed to the care of patients with diabetes. As such, the American Diabetes Association views *Diabetes Care* as a reaffirmation of Francis Weld Peabody's contention that "the secret of the care of the patient is in caring for the patient."

—Norbert Freinkel, *Diabetes Care*, January-February 1978

## EDITOR IN CHIEF

Steven E. Kahn, MB, ChB

## DEPUTY EDITORS

Cheryl A.M. Anderson, PhD, MPH, MS

John B. Buse, MD, PhD

Elizabeth Selvin, PhD, MPH

## AD HOC EDITORS

Mark A. Atkinson, PhD  
George Bakris, MD

Frank B. Hu, MD, MPH, PhD  
Stephen S. Rich, PhD

Matthew C. Riddle, MD

## ASSOCIATE EDITORS

Sonia Y. Angell, MD, MPH, DTM&H, FACP  
Vanita R. Aroda, MD  
Jessica R. Castle, MD  
Alice Y.Y. Cheng, MD, FRCPC  
Thomas P.A. Danne, MD  
Justin B. Echouffo Tcheugui, MD, PhD, MPhil  
Jose C. Florez, MD, PhD  
Meghana D. Gadgil, MD, MPH  
Amalia Gastaldelli, PhD

Jennifer B. Green, MD  
Ania M. Jastreboff, MD, PhD  
Alka M. Kanaya, MD  
Namratha R. Kandula, MD, MPH  
Csaba P. Kovessy, MD, FASN  
Neda Laiteerapong, MD, MS  
Kristen J. Nadeau, MD, MS  
Rodica Pop-Busui, MD, PhD  
Camille E. Powe, MD

Casey M. Rebholz, PhD, MS, MNSP, MPH, FAHA  
Michael R. Rickels, MD, MS  
Naveed Sattar, FMedSci, FRCPath, FRCPath, FRSE  
Jonathan E. Shaw, MD, MRCP (U.K.), FRACP  
Emily K. Sims, MD  
Kristina M. Utzschneider, MD  
Adrian Vella, MD, FRCP (Edin)  
Cuilin Zhang, MD, MPH, PhD

## EDITORIAL BOARD

David Aguilar, MD  
Mohamed K. Ali, MD, MSc, MBA  
Fida Bacha, MD  
A. Sidney Barritt IV, MD, MSCR, FACG, FAASLD  
Rita Basu, MD  
Tadej Battelino, MD, PhD  
Fiona Bragg, MBChB, MRCP, DPhil, FFPH  
Sonia Caprio, MD  
April Carson, PhD, MSPH  
Ranee Chatterjee, MD, MPH  
Mark Emmanuel Cooper, MB BS, PhD  
Matthew J. Crowley, MD, MHS  
Ian de Boer, MD, MS  
John M. Dennis, PhD  
J. Hans DeVries, MD, PhD  
Alessandro Doria, MD, PhD, MPH  
Denice Feig, MD, MSc, FRCPC  
Stephanie L. Fitzpatrick, PhD  
Hermes J. Florez, MD, PhD, MPH  
Juan Pablo Frias, MD  
Emily J. Gallagher, MB BCh BAO, MRCPI, PhD  
Edward W. Gregg, PhD  
Per-Henrik Groop, MD, DMSc, FRCPE

Ahmad Haidar, PhD  
Michael J. Haller, MD  
Jessica Lee Harding, PhD  
Stewart B. Harris, CM, MD, MPH, FCFP, FACPM  
Marie-France Hivert, MD, MMSc  
Silvio E. Inzucchi, MD  
Linong Ji, MD  
Alice Pik Shan Kong, MD  
Kamlesh Khunti, MD  
Richard David Graham Leslie, MD, FRCP, FAoP  
Ildiko Lingvay, MD, MPH, MSCS  
Andrea Luk, MD  
Viswanathan Mohan, MD, PhD, DSc, FACE, MACP  
Helen R. Murphy, MBBChBAO, FRACP, MD  
Michael A. Nauck, MD  
Katherine Ogurtsova, PhD  
Neha J. Pagidipati, MD, MPH  
Ewan Pearson, PhD, MA MB, BChir, FRCP, FRSE  
Monica E. Peek, MD, MPH, MS  
Frederik Persson, MD, DMSc  
Jeremy Pettus, MD  
Richard E. Pratley, MD  
David Preiss, PhD, FRCPath, MRCP

Jonathan Q. Purnell, MD, FTOS  
Qibin Qi, PhD  
Maria J. Redondo, MD, PhD, MPH  
Ravi Retnakaran, MD, MSc  
Peter Rossing, MD, DMSc  
Archana R. Sadhu, MD, FACE  
Desmond Schatz, MD  
Guntram Schernthaner, MD  
Jennifer Sherr, MD, PhD  
Jung-Im Shin, MD, PhD  
David Simmons, MA (Cantab), MB BS, FRCP, FRACP, MD (Cantab)  
Cate Speake, PhD  
Samy Suissa, PhD  
Kohjiro Ueki, MD, PhD  
Daniel van Raalte, MD, PhD  
Eva Vivian, PharmD, MS, PhD, CDCES, BC-ADM  
Pandora L. Wander, MD, MS, FACP  
Nicholas J. Wareham, FMedSci, FRCP, FFPH  
Deborah J. Wexler, MD, MSc  
Joseph Wolfsdorf, MB, BCh  
Geng Zong, PhD

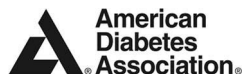

The mission of the American Diabetes Association is to prevent and cure diabetes and to improve the lives of all people affected by diabetes.

# Diabetes Care®

THE JOURNAL OF CLINICAL AND APPLIED RESEARCH AND EDUCATION

*Diabetes Care* is a journal for the health care practitioner that is intended to increase knowledge, stimulate research, and promote better management of people with diabetes. To achieve these goals, the journal publishes original research on human studies in the following categories: Clinical Care/Education/Nutrition/ Psychosocial Research, Epidemiology/Health Services Research, Emerging Technologies and Therapeutics, Pathophysiology/Complications, and Cardiovascular and Metabolic Risk. The journal also publishes ADA statements, consensus reports, clinically relevant review articles, letters to the editor, and health/medical news or points of view. Topics covered are of interest to clinically oriented physicians, researchers, epidemiologists, psychologists, diabetes educators, and other health professionals. More information about the journal can be found online at [diabetesjournals.org/care](http://diabetesjournals.org/care).

Copyright © 2022 by the American Diabetes Association, Inc. All rights reserved. Printed in the USA. Requests for permission to reuse content should be sent to Copyright Clearance Center at [www.copyright.com](http://www.copyright.com) or 222 Rosewood Dr., Danvers, MA 01923; phone: (978) 750-8400; fax: (978) 646-8600. Requests for permission to translate should be sent to Permissions Editor, American Diabetes Association, at [permissions@diabetes.org](mailto:permissions@diabetes.org).

The American Diabetes Association reserves the right to reject any advertisement for any reason, which need not be disclosed to the party submitting the advertisement.

Commercial reprint orders should be directed to Sheridan Content Services, (800) 635-7181, ext. 8065.

Single issues of *Diabetes Care* can be ordered by calling toll-free (800) 232-3472, 8:30 A.M. to 5:00 P.M. EST, Monday through Friday. Outside the United States, call (703) 549-1500. Rates: \$75 in the United States, \$95 in Canada and Mexico, and \$125 for all other countries.

*Diabetes Care* is available online at [diabetesjournals.org/care](http://diabetesjournals.org/care). Please call the numbers listed above, e-mail [membership@diabetes.org](mailto:membership@diabetes.org), or visit the online journal for more information about submitting manuscripts, publication charges, ordering reprints, subscribing to the journal, becoming an ADA member, advertising, permission to reuse content, and the journal's publication policies.

Periodicals postage paid at Arlington, VA, and additional mailing offices.

PRINT ISSN 0149-5992  
ONLINE ISSN 1935-5548  
PRINTED IN THE USA

---

## AMERICAN DIABETES ASSOCIATION OFFICERS

CHAIR OF THE BOARD  
Christopher Ralston, JD

CHAIR OF THE BOARD-ELECT  
Rone Luczynski

CHIEF EXECUTIVE OFFICER  
Charles D. Henderson

PRESIDENT, MEDICINE & SCIENCE  
Guillermo Umpierrez, MD, CDCES

PRESIDENT-ELECT, MEDICINE & SCIENCE  
Rodica Pop-Busui, MD, PhD

CHIEF SCIENTIFIC & MEDICAL OFFICER  
Robert A. Gabbay, MD, PhD

PRESIDENT, HEALTH CARE & EDUCATION  
Otis Kirksey, PharmD, RPh, CDCES, BC-ADM

PRESIDENT-ELECT, HEALTH CARE & EDUCATION  
Janet Brown-Friday, RN, MSN, MPH

SECRETARY/TREASURER  
Marshall Case

SECRETARY/TREASURER-ELECT  
Todd F. Brown, PMP

---

## AMERICAN DIABETES ASSOCIATION PERSONNEL AND CONTACTS

VICE PRESIDENT & PUBLISHER,  
PROFESSIONAL PUBLICATIONS  
Christian S. Kohler

DIRECTOR, PEER REVIEW  
Shannon C. Potts

PHARMACEUTICAL & CONSUMER ADVERTISING  
Tina Auletta  
Senior Account Manager  
[tauletta@diabetes.org](mailto:tauletta@diabetes.org)

DIRECTOR, SCHOLARLY JOURNALS  
Heather Norton Blackburn

MANAGER, PEER REVIEW  
Larissa M. Pouch

PHARMACEUTICAL & DEVICE DIGITAL ADVERTISING  
eHealthcare Solutions  
R.J. Lewis  
President and CEO  
[rlewis@ehsmail.com](mailto:rlewis@ehsmail.com)  
(609) 882-8887, ext. 101

ASSOCIATE DIRECTOR, PRODUCTION & DESIGN  
Keang Hok

DIRECTOR, MEMBERSHIP/  
SUBSCRIPTION SERVICES  
Donald Crowl

DIGITAL PRODUCTION MANAGER  
Amy Moran

ASSOCIATE DIRECTOR, EDITORIAL  
Theresa M. Cooper

SENIOR ADVERTISING MANAGER  
Julie DeVoss Graff  
[jgraff@diabetes.org](mailto:jgraff@diabetes.org)  
(703) 299-5511

SENIOR MANAGER, BILLING & COLLECTIONS  
Jim Harrington  
[jharrington@diabetes.org](mailto:jharrington@diabetes.org)

TECHNICAL EDITOR  
Sandro Vitaglione
